# Supplementary material for: Bacterial and Fungal Endophytic Microbiomes of Salicornia europaea
Source: PubMed Central journal article supplement (PMC6581177; doi:10.1128/aem.00305-19), 2019-06-17
Supplement: AEM.00305-19-s0001.pdf [file AEM.00305-19-s0001.pdf]

**Exploring bacterial and fungal endophytic microbiomes of *Salicornia europaea***

Bliss Furtado<sup>1,3</sup>, Marcin Gołębiewski<sup>2,3</sup>, Monika Skorupa<sup>3</sup>, Piotr Hulisz<sup>4</sup>, Katarzyna  
Hrynkiewicz<sup>1,3\*</sup>

<sup>1</sup>Department of Microbiology, Faculty of Biology and Environmental Protection, Nicolaus Copernicus University, Lwowska 1, 87-100 Torun, Poland

<sup>2</sup>Department of Plant Physiology and Biotechnology, Nicolaus Copernicus University, Lwowska 1, 87-100 Torun, Poland

<sup>3</sup>Interdisciplinary Center for Modern Technologies, Nicolaus Copernicus University, Wilenska 4, 87-100 Torun, Poland

<sup>4</sup>Department of Soil Science and Landscape Management, Faculty of Earth Sciences, Nicolaus Copernicus University, Lwowska 1, 87-100 Toruń, Poland

\* Corresponding author:

K. Hrynkiewicz

Phone: (+48)-56-6114447; Fax: (+48)-56-6114772

E-mail:[hrynk@umk.pl](mailto:hrynk@umk.pl)

**Table S1** Potential role of *Salicornia* bacterial and fungal endophytic strains reported in this study.

A

| <b>Bacterial genus</b>   | <b>NCBI accession no.</b> | <b>Group</b>            | <b>Source of isolation</b>            | <b>Potential function</b>                                       | <b>References</b>        |
|--------------------------|---------------------------|-------------------------|---------------------------------------|-----------------------------------------------------------------|--------------------------|
| <i>Aestuariicella</i>    | KF982858                  | ND                      | sea tidal flat                        | hydrocarbon-degrading                                           | Naysim et al. 2015       |
| <i>Arcobacter</i>        | JF521610                  | endophyte               | Bryopsis specimens                    | ND                                                              | Hollants et al. 2011     |
| <i>Flavimarina</i>       | KX664463                  | endophyte               | <i>Salicornia herbacea</i>            | hydrolyse gelatin                                               | Cho et al. 2017          |
| <i>Halomonas</i>         | LWGO00000000              | endophyte               | roots of <i>Cyperus conglomeratus</i> | PGP                                                             | Lafi et al. 2016         |
| <i>Idiomarina</i>        | KP706811                  | ND                      | coastal plain                         | ND                                                              | You et al. 2015          |
| <i>Kushneria</i>         | LN651144                  | endophyte               | leaves of Salicornioideae             | ND                                                              | Mora-Ruiz et al. 2015    |
| <i>Leeuwenhoekiella</i>  | DQ294290 and DQ294291     | ND                      | seawater                              | degradation of organic matter during and following algal blooms | Pinhassi et al. 2006     |
| <i>Lewinella</i>         | KX499306                  | epiphytes               | <i>Caulerpa cylindracea</i>           | ND                                                              | Stabili et al. 2017      |
| <i>Marinimicrobium</i>   | HQ882175                  | ND                      | marine solar saltern                  | inulinase activity                                              | Li et al. 2012           |
| <i>Marinobacter</i>      | PRJEB8726                 | endophyte / rhizosphere | roots of <i>Suaeda salsa</i>          | PGP                                                             | Yuan et al. 2016         |
| <i>Marivirga</i>         | JX500546                  | ND                      | rhizosphere                           | ND                                                              | Haldar et al. 2015       |
| <i>Massilia</i>          | ND                        | endophyte               | stalk of maize plant                  | IAA producer                                                    | Celador-Lera et al. 2016 |
| <i>Nocardioides</i>      | AY148081                  | endophyte               | wheat roots                           | induce defence                                                  | Conn et al. 2008         |
| <i>Planomicrobium</i>    | KP209393                  | endophyte               | <i>Lavandula angustifolia</i>         | antimicrobial activity                                          | Beiranvand et al. 2017   |
| <i>Pseudoalteromonas</i> | AOPM00000000              | ND                      | saltern                               | enzyme activity                                                 | Haba et al. 2013         |
| <i>Psychrobacter</i>     | AJ748266                  | endophyte               | <i>Arthrocnemum macrostachyum</i>     | ND                                                              | Mora-Ruiz et al. 2016    |
| <i>Saccharospirillum</i> | KY310592                  | endophyte               | <i>Halimione portulacoides</i>        | ND                                                              | Fidalgo et al. 2017      |

|                        |            |           |                                                      |                              |                           |
|------------------------|------------|-----------|------------------------------------------------------|------------------------------|---------------------------|
| <i>Salegentibacter</i> | ND         | ND        | water and sediment samples                           | cytotoxic effects in mammals | Díaz-Cárdenas et al. 2017 |
| <i>Salinicola</i>      | KT036407 S | endophyte | <i>Spartina maritima</i>                             | PGP                          | Mesa et al. 2015          |
| <i>Thalassospira</i>   | KU587165   | endophyte | roots of Caliph medic ( <i>Medicago truncatula</i> ) | ND                           | Yaish et al. 2016         |
| <i>Vibrio</i>          | KT036401   | endophyte | <i>Spartina maritima</i>                             | PGP                          | Mesa et al. 2015          |

## B

| Fungal genus             | NCBI accession no. | Group     | Source of isolation                    | Potential function                          | References              |
|--------------------------|--------------------|-----------|----------------------------------------|---------------------------------------------|-------------------------|
| <i>Plenodomus</i>        | KY064055           | pathogen  | Chrysanthemum sp.                      | ND                                          | Marin-Felix et al. 2017 |
| <i>Paradendryphiella</i> | KT207744           | ND        | Marine brown algae, Sargassum sp.      | antifungal and antioxidant activity         | Hong et al. 2015        |
|                          | AB975313           | endophyte | <i>Salicornia europaea</i>             | ND                                          | Okane et al. 2015       |
| <i>Neodevriesia</i>      | NR_132905          | ND        | leaves of <i>Afrocarpus falcatus</i>   | saprobic or plant pathogenic                | Crous et al. 2014       |
| <i>Neocamarosporium</i>  | KX817217           | ND        | saline lakes of Iran                   | ND                                          | Papizadeh et al. 2017   |
| <i>Didymella</i>         | AB975296           | endophyte | <i>Salicornia europaea</i>             | ND                                          | Okane et al. 2015       |
| <i>Alternaria</i>        | EU143251           | endophyte | leaves of <i>Polygonum senegalense</i> | production of natural cytotoxic metabolites | Aly et al. 2008         |
|                          | FJ465171           | endophyte | leaves of <i>Sonneratia alba</i>       | secondary metabolites                       | Kjer et al. 2009        |

Abbreviations: **PGP**- plant growth promoting, **ND**- not defined

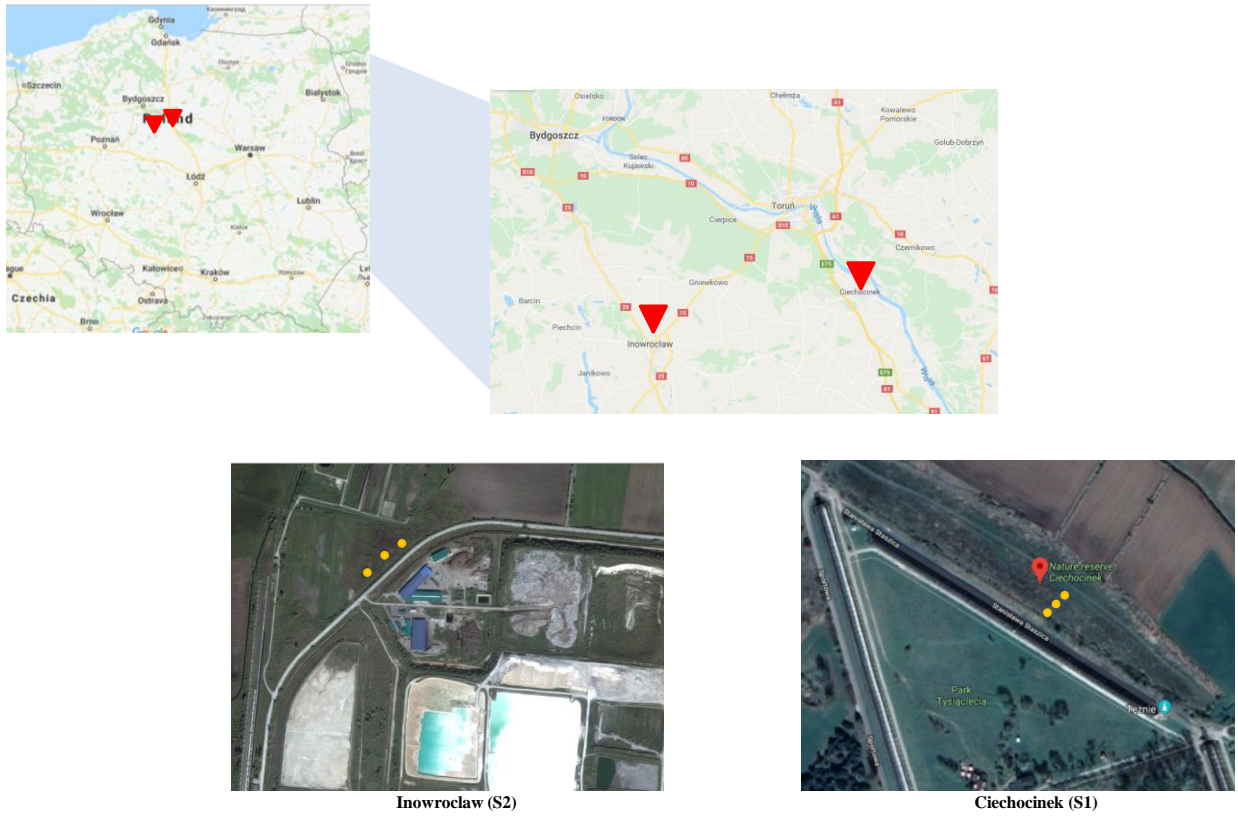

**Fig. S1** Two sample collection sites in Central Poland: The map highlights the two salt affected sites S1- Ciechocinek and S2- Inowrocław and the three plots of which the three plant biological replicates were collected.

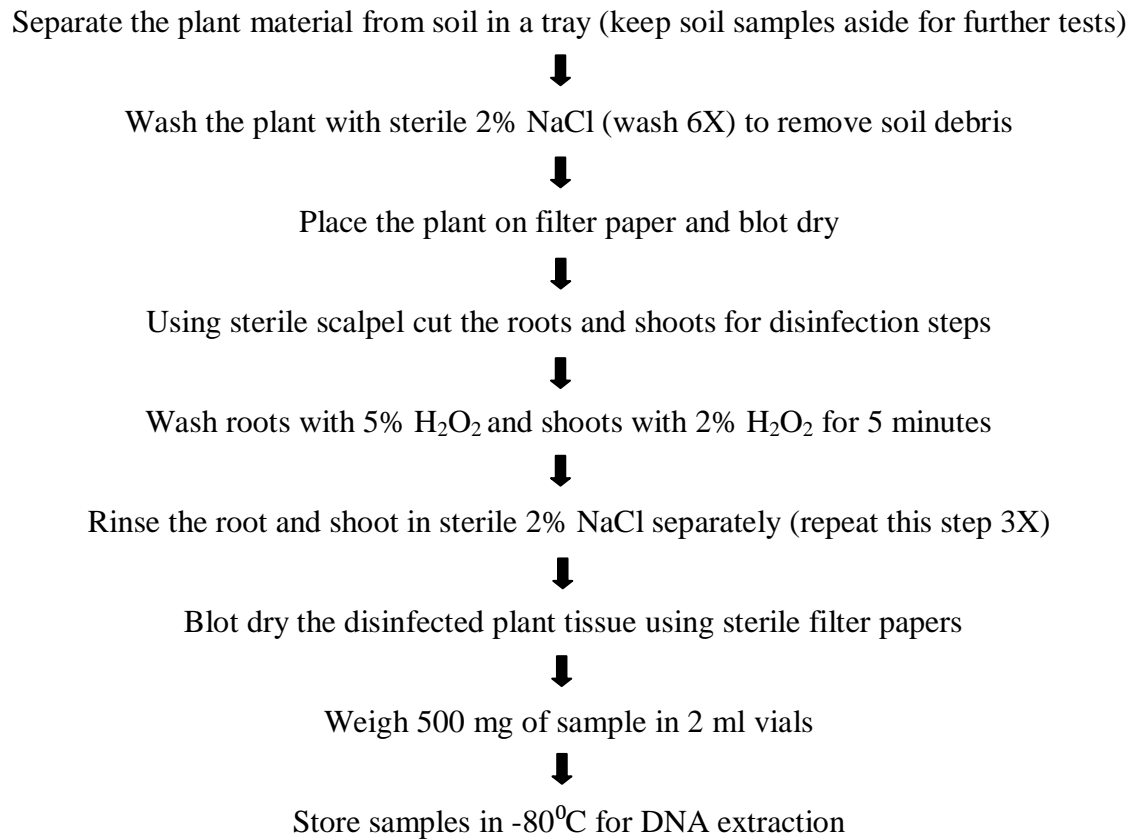

**Fig. S2** Summary of plant surface sterilization technique.

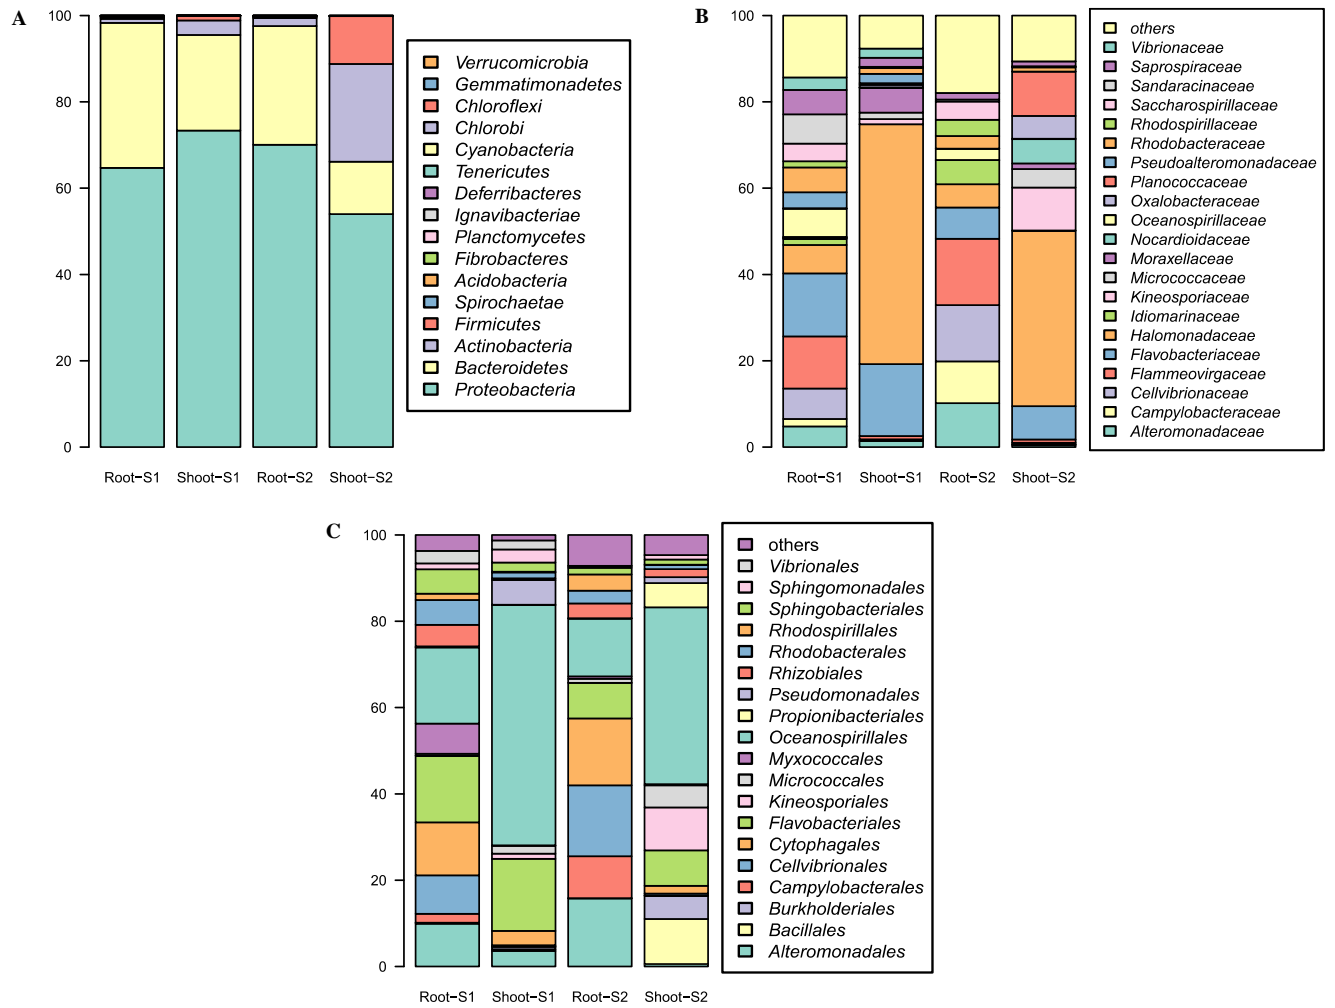

**Fig. S3** Endophytic bacterial community structure at the (A) phylum (B) family and (C) order level between test sites and plant organ.

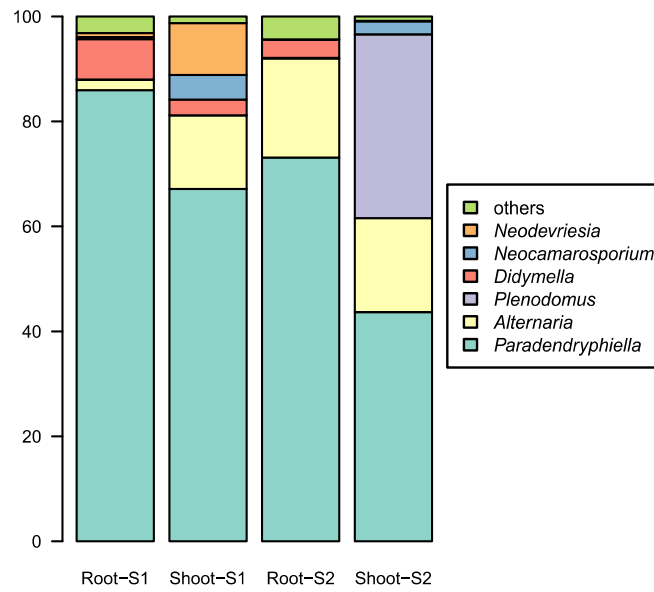

**Fig. S4** Endophytic fungal community structure at the genus level between test sites and plant organ.

## References

1. Aly AH, Edrada-Ebel R, Indriani ID, Wray V, Müller WEG, Totzke F, et al. Cytotoxic Metabolites from the Fungal Endophyte *Alternaria* sp. and Their Subsequent Detection in Its Host Plant *Polygonum senegalense*. *J Nat Prod.* 2008; 71:972–80. doi:10.1021/np070447m.
2. Beiranvand M, Amin M, Hashemi-Shahraki A, Romani B, Yaghoubi S, Sadeghi P. Antimicrobial activity of endophytic bacterial populations isolated from medical plants of Iran. *Iranian Journal of Microbiology.* 2017;9(1):11-18.
3. Celador-Lera L., Menéndez E., Flores-Félix J.D., Mateos P.F., Rivas R. Analysis of the PGPB Potential of Bacterial Endophytes Associated with Maize. In: González-Andrés F., James E. (eds) *Biological Nitrogen Fixation and Beneficial Plant-Microbe Interaction.* Springer, Cham 2016 doi:[https://doi.org/10.1007/978-3-319-32528-6\\_3](https://doi.org/10.1007/978-3-319-32528-6_3)
4. Cho E-S, Cha I-T, Park J-M, Choi H-J, Lee JH, Roh SW, et al. *Flavimarina flava* sp. nov., isolated from *Salicornia herbacea*. *Int J Syst Evol Microbiol.* 2017;67:4240–5. doi:10.1099/ijsem.0.002292.
5. Conn V M; Walker A R; Franco C M M. Endophytic actinobacteria induce defense pathways in *Arabidopsis thaliana*. *Molecular Plant-Microbe Interactions* 2008, 21, 208-218.
6. Crous PW, Shivas RG, Quaedvlieg W, et al. Fungal Planet description sheets: 214–280. *Persoonia : Molecular Phylogeny and Evolution of Fungi.* 2014; 32:184-306. doi:10.3767/003158514X682395.
7. de la Haba RR, Sanchez-Porro C, Leon MJ, Papke RT, Ventosa A. Draft genome sequence of the moderately halophilic bacterium *Pseudoalteromonas ruthenica* Strain CP76. *Genome Announc.* 2013;1. doi:10.1128/genomeA.00268-13.
8. Díaz-Cárdenas, Carolina, Cantillo, Angela, Rojas, Laura Yinneth Sandoval, Tito, Fiorentino, Susana, Robles, Jorge, Ramos, Freddy A., Zambrano, María Mercedes, Baena, Sandra. Microbial diversity of saline environments: searching for cytotoxic activities. *AMB Express* 2017; 7:223 <https://doi.org/10.1186/s13568-017-0527-6>
9. Fidalgo C, Rocha J, Proença DN, Morais PV, Alves A, Henriques I. *Saccharospirillum correia* sp. nov., an endophytic bacterium isolated from the halophyte *Halimione*



- portulacoides. *Int J Syst Evol Microbiol.* 2017; 67:2026–30. doi:10.1099/ijsem.0.001914.
10. Haldar, S. and Sengupta, S. Impact of plant development on the rhizobacterial population of *Arachis hypogaea*: a multifactorial analysis. *J. Basic Microbiol.*, 2015; 55: 922-928. doi:10.1002/jobm.201400683
  11. Hollants, J., Leroux, O., Leliaert, F., Decleyre, H., De-Clerck, O., and Willems, A. Who is in there? exploration of endophytic bacteria within the siphonous green seaweed *Bryopsis* (Bryopsidales, Chlorophyta). *PLoS ONE* 2011; 6:e26458. doi: 10.1371/journal.pone.0026458
  12. Hong, J.-H.; Jang, S.; Heo, Y.M.; Min, M.; Lee, H.; Lee, Y.M.; Lee, H.; Kim, J.-J. Investigation of marine-derived fungal diversity and their exploitable biological activities. *Mar. Drugs* 2015, 13, 4137–4155.
  13. Kjer J, Wray V, Edrada-Ebel R, Ebel R, Pretsch A, Lin W, et al. Xanalteric Acids I and II and related phenolic compounds from an endophytic *Alternaria* sp. Isolated from the Mangrove Plant *Sonneratia alba*. *J Nat Prod.* 2009; 72:2053–7. Doi: 10.1021/np900417g.
  14. Lafi FF, Ramirez-Prado JS, Alam I, Bajic VB, Hirt H, Saad MM. Draft genome sequence of *Halomonas elongata* strain K4, an endophytic growth-promoting bacterium enhancing salinity tolerance in planta. *Genome Announc* 2016 4(6):e01214-16. doi:10.1128/genomeA.01214-16.
  15. Li, AX., Guo, LZ. & Lu, WD. Alkaline inulinase production by a newly isolated bacterium *Marinimicrobium* sp. LS–A18 and inulin hydrolysis by the enzyme World J Microbiol Biotechnol 2012; 28: 81. <https://doi.org/10.1007/s11274-011-0794-3>
  16. Marin-Felix Y, Groenewald JZ, Cai L, et al. Genera of phytopathogenic fungi: GOPHY 1. *Studies in Mycology* 2017; 86: 99–216
  17. Mesa J, Mateos-Naranjo E, Caviedes MA, Redondo-Gómez S, Pajuelo E and Rodríguez-Llorente ID Endophytic cultivable bacteria of the metal bioaccumulator *Spartina maritima* improve plant growth but not metal uptake in polluted marshes soils. *Front. Microbiol.* 2015; 6:1450. doi: 10.3389/fmicb.2015.01450
  18. Mora-Ruiz, M. D. R., Font-Verdera, F., Orfila, A., Rita, J., and Rossel-Mora, R. Endophytic microbial diversity of the halophyte *Arthrocnemum macrostachyum* across

- plant compartments. FEMS Microbiol. Ecol. 2016; 92, 1–10. doi:10.1093/femsec/fiw145
19. Mora-Ruiz, M. R., Font-Verdera, F., Díaz-Gil, C., Urdiain, M., Rodríguez-Valdecantos, G., González, B., et al. Moderate halophilic bacteria colonizing the phylloplane of halophytes of the subfamily Salicornioideae (Amaranthaceae). Syst. Appl. Microbiol. 2015; 38, 406–416. doi: 10.1016/j.syapm.2015. 05.004
  20. Naysim Lo, Kyung Hyun Kim, KyunghwaBaek, Baolei Jia and Che Ok Jeon *Aestuariicella hydrocarbonica* gen. nov., sp. nov., an aliphatic hydrocarbon-degrading bacterium isolated from a sea tidal flat. International Journal of Systematic and Evolutionary Microbiology 2015, 65, 1935–1940 DOI 10.1099/ijs.0.000199
  21. Okane, I., and Nakagiri, A. Assemblages of endophytic fungi on *Salicornia europaea* disjunctively distributed in Japan: towards clarification of the ubiquity of fungal endophytes on halophytes and their ecological roles. Curr. Sci. 2015; 109, 62–71
  22. Papizadeh, M., Wijayawardene, N.N., Amoozegar, M.A. et al. *Neocamarosporium jorjanensis*, *N. persepolis*, and *N. solicola* spp. nov. (Neocamarosporiaceae, Pleosporales) isolated from saline lakes of Iran indicate the possible halotolerant nature for the genus *Mycol* Progress 2018 17: 661. <https://doi.org/10.1007/s11557-017-1341-x>
  23. Pinhassi J, Bowman J, Nedashkovskaya O, Lekunberri I, Gomez-Consarnau L, Pedrós-Alió C. *Leeuwenhoekella blandensis* sp. nov., a genome-sequenced marine member of the family Flavobacteriaceae. Int J Syst Evol Microbiol 2006; 56(7):1489-1493 doi:10.1099/ijs.0.64232-0
  24. Stabili Loredana, Rizzo Lucia, Pizzolante Graziano, Alifano Pietro, Frascetti Simonetta. Spatial distribution of the culturable bacterial community associated with the invasive alga *Caulerpa cylindracea* in the Mediterranean Sea, Marine Environmental Research, 2017; Vol. 125, Pg. 90-98, ISSN 0141-1136, <https://doi.org/10.1016/j.marenvres.2017.02.001>.
  25. Yaish MW, Al-Lawati A, Jana GA, Vishwas Patankar H, Glick BR. Impact of soil salinity on the structure of the bacterial endophytic community identified from the roots of *Caliph medic* (*Medicago truncatula*). PLoS One. 2016; 11:e0159007. doi:10.1371/journal.pone.0159007.

26. You Y-H, Jin YJ, Kang S-M, Oh S, Lee M-C, Kim J-G. Plant growth-promoting activity and identification of endophytic fungi isolated from native plant in East coast. *Korean J Microbiol.* 2015; 51:14–20. doi:10.7845/kjm.2015.5005.
27. Yuan, Z. et al. Specialized microbiome of a halophyte and its role in helping non-host plants to withstand salinity. *Sci. Rep.* 2016; 6, 32467; doi: 10.1038/srep3.
